# Supplementary material
Source: Springer Nature journal article supplement (https://www.springermedizin.de/resource/supplementary/13058_2011_2984_MOESM5_ESM.pdf/9703014)

A

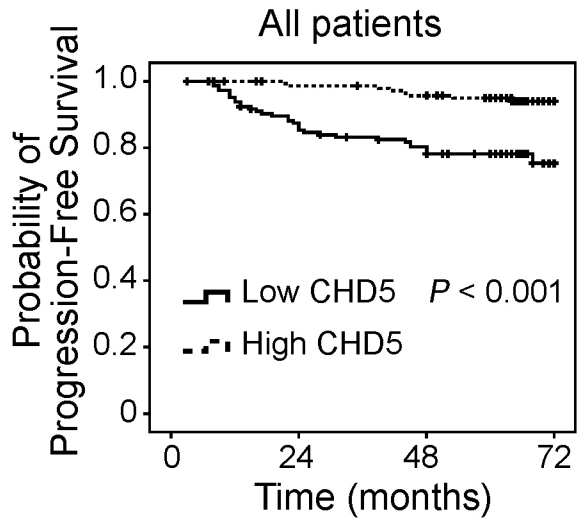

B

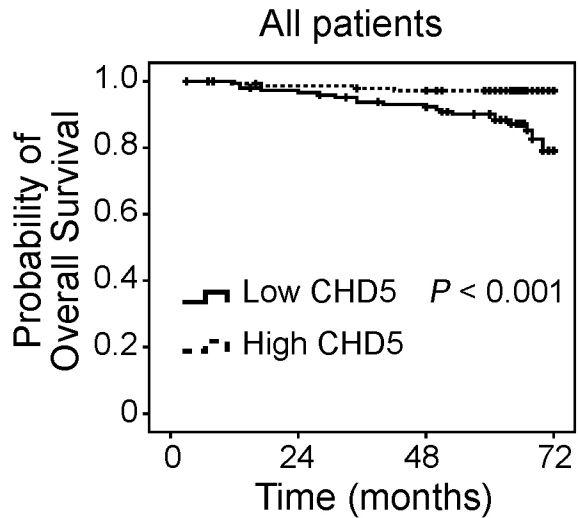

Supplement: MOESM5 [file 9703014]
